# Supplementary material
Source: publisher site journal article supplement (https://www.dovepress.com/article/480405)
Supplement: Supplementary file 1 [file 480405%20Revised%20Supplementary%20Material.docx]

Supplementary Material

**Supplementary Material 1 GC-TOF-MS Experimental instrument list**

| **Instrument** | **Model** | **Brand** |
| --- | --- | --- |
| Gas chromatography | 7890A | Agilent |
| Mass spectrometer | PEGASUS HT | LECO |
| Column | DB-5MS（30m×250μm×0.25μm） | Agilent |

**Supplementary Material 2 GC-TOF-MS Experimental reagent list**

| **Name** | **Batch Number** | **Purity** | **Brand** |
| --- | --- | --- | --- |
| Methanol | 67-56-1 | HPLC | CNW Technologies |
| Chloroform | 67-66-3 | HPLC | Adamas |
| Pyridine | 110-86-1 | HPLC | Adamas |
| Methoxy aminatio hydrochloride | 593-56-6 | AR | TCI |
| Adonitol | 488-81-3 | ≥99% | SIGMA |
| BSTFA（with 1% TMCS, v/v） | -- | -- | REGIS Technologies |
| FAMEs | -- | -- | Dr. Ehrenstorfer |

**Supplementary Material 3 UHPLC-QE-MS Experimental instrument list**

| **Instrument** | **Model** | **Brand** |
| --- | --- | --- |
| Ultra high performance liquid phase | Vanquish | Thermo Fisher Scientific |
| High resolution mass spectrometry | Q Exactive HFX | Thermo Fisher Scientific |
| Column | ACQUITY UPLC HSS T3 (2.1mm×100mm，1.7μm) | Waters |

**Supplementary Material 4 UHPLC-QE-MS Experimental reagent list**

| **Name** | **Batch Number** | **Purity** | **Brand** |
| --- | --- | --- | --- |
| Methanol | 67-56-1 | LC-MS | CNW Technologies |
| Acetonitrile | 75-05-8 | LC-MS | CNW Technologies |
| Ammonium acetate | 631-61-8 | LC-MS | CNW Technologies |
| Ammonium hydroxide | 1336-21-6 | LC-MS | CNW Technologies |
